# Supplementary material for: N-doped microporous carbons derived from direct carbonization of K+ exchanged meta-aminophenol–formaldehyde resin for superior CO2 sorption
Source: Royal Society of Chemistry journal article supplement (doi:10.1039/c4cc10364e), 2015-01-01
Supplement: c4cc10364e1.pdf [file c4cc10364e1.pdf]

## Supporting Information

### **N-doped microporous carbons derived from direct carbonization of K<sup>+</sup> exchanged meta-aminophenol-formaldehyde resin for superior CO<sub>2</sub> sorption**

*Jin Zhou,<sup>a</sup> Zhaohui Li,<sup>a</sup> Wei Xing,<sup>b\*</sup> Tingting Zhu,<sup>a</sup> Honglong Shen,<sup>a</sup> and Shuping Zhuo<sup>a\*</sup>*

*<sup>a</sup> School of Chemical Engineering, Shandong University of Technology, Zibo 255049, P. R. China.  
Tel./fax: +86 533 2781664*

*<sup>b</sup> School of Science, State Key Laboratory of Heavy Oil Processing, China University of  
Petroleum Qingdao 266580 (P. R. China). Fax: (+) +86-533-86983579*

*\*Corresponding author: S. Zhuo, E-mails: zhuosp\_academic@yahoo.com*

*W. Xing, E-mails: xingwei@upc.edu.cn*

## **Contents:**

### **1. Preparation of NMC-x**

### **2. Analysis of the narrow microporosity by Dubinin–Radushkevich equation**

### **3. Characterization of NMC-x**

### **4. Sorption measurement**

### **5. Calculation of heats of adsorption**

**Table S1** Texture properties and element compositions of NMC-x samples

**Table S2** N-containing groups on the surface of NMC-x samples

**Table S3** Element analysis of NMC-x samples

**Table S4** CO<sub>2</sub> sorption capacities of NMC-x at different temperatures and pressures

**Table S5** CO<sub>2</sub> uptake values of various porous carbon materials at 25 °C

**Fig. S1** Digital camera image of xerogels

**Fig. S2** D-R plots for CO<sub>2</sub> sorption by (a) NMC-700, (b) NMC-800 and (c) NMC-900

**Fig. S3** (a) Raman spectra and (b) XRD patterns of NMC-x

**Fig. S4** EDS mapping of NMC-600

**Fig. S5** CO<sub>2</sub> sorption isotherms at elevated temperature

**Fig. S6** Initial slope calculation for CO<sub>2</sub> and N<sub>2</sub> isotherms collected at 25 °C

**Fig. S7** Regeneration of NMC-800 for CO<sub>2</sub> uptake at 25 °C

## **1. Preparation of NMC-x**

In a typical synthesis, 1.10 g meta-aminophenol (10 mmol) and 0.56 g KOH (10 mmol) were dissolved into 5 mL H<sub>2</sub>O, and stirred for 1 h to form a pale yellow clear solution. Afterward, 1.60 g formalin (37%, 20 mmol formaldehyde) was added into the above solution and stirred for ca. 30 min at 25 °C. The solution was then sealed and transferred into an oven at 80 °C. The solution quickly turned red and solidified within 30 min. After curing for 72 h, the obtained dark red hydrogel was immersed in acetone for three days in which fresh acetone were replaced daily. The washed hydrogels were dried under flow air to give dark red xerogels (Fig. S1). For carbonization, the xerogels were heated under Ar atmosphere to 200 °C with a heating rate of 2 °C min<sup>-1</sup>, then maintained at 200 °C for 1h, and subsequently heated to a certain temperature with a heating rate of 5 °C min<sup>-1</sup> and kept at this temperature for 1.5 hours. Finally, the N-doped microporous carbons (NMC-x, where x designates the final heating temperature in °C) were liberated by washing with dilute HCl (10 wt%) and deionized water to neutrality.

## **2. Characterization of NMC-x**

Microscopic morphology of the prepared carbon materials were observed with a scanning electron microscope (SEM, Sirion 200 FEI Netherlands) and a transmission electron microscope (JEM2100, JEOL, Japan). Surface chemical properties were determined by X-ray photoelectron spectroscopy (XPS, Escalab 250, USA). X-ray diffraction (XRD) patterns were conducted by using a Bruker D8 Advance diffractometer with Cu K $\alpha$  radiation. Raman spectra were collected by a LabRAM HR800 from JY Horiba. The element contents and C/H/N ratios of NMC-x were determined by a Vario ELcube elemental analysis system.

### 3. Sorption measurement:

All the gas sorption measurements were conducted on a Micromeritics ASAP 2020 static volumetric analyzer. The samples were degassed at 150 °C overnight before sorption measurements. The surface area and pore size distribution (PSD) of the NMC-*x* were analysed by means of N<sub>2</sub> sorption at -196 °C and CO<sub>2</sub> adsorption at 0 °C. The BET (Brunauer-Emmett-Teller) surface area ( $S_{\text{BET}}$ ) and Langmuir surface area ( $S_{\text{L}}$ ) were calculated using the N<sub>2</sub> adsorption isotherm data within the relative pressure ranging from 0.05 to 0.25. Total pore volume ( $V_{\text{T}}$ ) was obtained at a relative pressure of 0.995. For the calculation of PSD, nonlocal density functional theory (NLDFT) models are widely applied, and featured in a standard by ISO (*ISO-15901-3: Pore size distribution and porosity of solid materials by mercury porosimetry and gas adsorption—Part3: Analysis of micropores by gas adsorption.*). Standard NLDFT models assume an idealized flat-graphitic-like surface. In contrast to NLDFT models, quenched solid density functional theory (QSDFT) models take into account carbon surface roughness features. According to several previous reports<sup>1-3</sup>, the chosen NLDFT models may not describe all the subtleties of a real carbon surface. QSDFT models provide a better representation of the surface properties, including surface roughness features. However, QSDFT models are not yet available for all of the different measurement conditions (e.g., CO<sub>2</sub>, 0 °C). Thus, in this work, the pore size distributions of NMC-*x* were determined by using QSDFT methods considering sorption of nitrogen at -196 °C in carbon as a model adsorbent and slit-like pores as a pore model, or in the case of CO<sub>2</sub> (0 °C), NLDFT methods for carbon with slit-like pores as a pore model. The implemented QSDFT models were supplied by Quantachrome Autosorb iQ2.02 software. The CO<sub>2</sub> sorption experiments were performed at different temperatures.

### 4. Analysis of the narrow microporosity by Dubinin–Radushkevich equation:

The CO<sub>2</sub> adsorption data obtained at 0°C were used to analyze the narrow microporosity by means of the Dubinin–Radushkevich (D–R) equation<sup>4,5</sup>:

$$V = V_0 \exp\{-k(RT / \beta)^2 [2.303 \lg(P_0 / P)]^2\} \quad (1)$$

where  $V$  (cm<sup>3</sup> g<sup>-1</sup>) is the volume filled at a temperature  $T$  and the relative pressure ( $P/P_0$ ),  $V_0$  (cm<sup>3</sup> g<sup>-1</sup>) is the micropore volume, and  $k$  and  $\beta$  are a constant about the pore structure and the affinity coefficient ( $\beta = 0.35$  for CO<sub>2</sub>), respectively. The average micropore width,  $L$  (nm), was calculated

by means of the empirical correlation proposed by Stoeckli et al. <sup>6</sup>:

$$L = 10.8/(E_0 - 11.4) \quad (2)$$

where  $E_0$  is the characteristic energy.

## 5. Calculation of heats of adsorption:

The isosteric heats of adsorption ( $Q_{st}$ ) were calculated according to Clausius-Clapeyron equation:

$$\ln\left(\frac{p_1}{p_2}\right) = Q_{st} \times \frac{T_2 - T_1}{R \times T_1 \times T_2} \quad (3)$$

where  $Q_{st}$  is the isosteric heats of adsorption,  $T_i$  represents a temperature at which an isotherm  $i$  is measured,  $p_i$  represents a pressure at which a specific equilibrium adsorption amount is reached at  $T_i$ ,  $R$  is gas constant (8.314 J K<sup>-1</sup> mol<sup>-1</sup>).

**Table S1** Texture properties and element compositions of NMC-*x* samples

| Sample  | N <sub>2</sub> adsorption at -196 °C                  |                                                         |                                                          |                                                          |                                                     | CO <sub>2</sub> adsorption at 0 °C          |                                  |             |
|---------|-------------------------------------------------------|---------------------------------------------------------|----------------------------------------------------------|----------------------------------------------------------|-----------------------------------------------------|---------------------------------------------|----------------------------------|-------------|
|         | $S_{\text{BET}}$<br>(m <sup>2</sup> g <sup>-1</sup> ) | $S_{\text{micro}}$<br>(m <sup>2</sup> g <sup>-1</sup> ) | $V_{\text{total}}$<br>(cm <sup>3</sup> g <sup>-1</sup> ) | $V_{\text{micro}}$<br>(cm <sup>3</sup> g <sup>-1</sup> ) | $S_{\text{L}}$<br>(m <sup>2</sup> g <sup>-1</sup> ) | $V_0$<br>(cm <sup>3</sup> g <sup>-1</sup> ) | $E_0$<br>(kJ mol <sup>-1</sup> ) | $L$<br>(nm) |
| NMC-600 | 272                                                   | 270                                                     | 0.15                                                     | 0.14                                                     | 397                                                 | 0.26                                        | 32.85                            | 0.50        |
| NMC-700 | 518                                                   | 498                                                     | 0.27                                                     | 0.26                                                     | 746                                                 | 0.29                                        | 32.54                            | 0.51        |
| NMC-800 | 603                                                   | 589                                                     | 0.31                                                     | 0.30                                                     | 877                                                 | 0.35                                        | 31.31                            | 0.54        |
| NMC-900 | 664                                                   | 641                                                     | 0.34                                                     | 0.33                                                     | 934                                                 | 0.36                                        | 29.88                            | 0.58        |

\*Brunauer–Emmett–Teller (BET) surface area ( $S_{\text{BET}}$ ) and Langmuir surface area ( $S_{\text{L}}$ ) were calculated using the N<sub>2</sub> adsorption isotherm data within the relative pressure range of 0.05–0.25. Total pore volume ( $V_{\text{T}}$ ) was obtained at  $P/P_0 = 0.995$ . Micropore volume ( $V_{\text{micro}}$ ) was calculated by  $t$ -plot method. Mesopore volume ( $V_{\text{meso}}$ ) was determined by subtracting the micropore volume from the total pore volume.  $E_0$  is the characteristic energy,  $V_0$  (cm<sup>3</sup> g<sup>-1</sup>) is the micropore volume,  $L$  is the average micropore width calculated by means of the empirical correlation proposed by Stoeckli et al (vide infra).

**Table S2** N-containing groups on the surface of NMC-*x* samples

| Sample  | C (at%) | O (at%) | Nitrogen species (at%) |             |       |            |              |
|---------|---------|---------|------------------------|-------------|-------|------------|--------------|
|         |         |         | total                  | pyridinic-N | -C=NH | pyrrolic N | quaternary N |
| NMC-600 | 84.0    | 12.2    | 3.8                    | 0.6         | 0.2   | 1.5        | 1.5          |
| NMC-700 | 84.2    | 12.3    | 3.5                    | 0.8         | 0.2   | 1.6        | 0.7          |
| NMC-800 | 87.5    | 9.3     | 3.2                    | 1.0         | 0.4   | 0.7        | 1.4          |
| NMC-900 | 88.1    | 10.6    | 1.3                    | 0.3         | 0.3   | 0.2        | 0.5          |

**Table S3** Element analysis of NMC-*x* samples

| Sample  | Element content (wt%) |      |      | C/H  | C/N  |
|---------|-----------------------|------|------|------|------|
|         | C                     | H    | N    |      |      |
| NMC-600 | 74.32                 | 2.05 | 6.33 | 36.2 | 11.7 |
| NMC-700 | 78.26                 | 1.95 | 6.06 | 40.1 | 12.9 |
| NMC-800 | 79.14                 | 1.56 | 4.24 | 50.7 | 18.7 |
| NMC-900 | 83.76                 | 0.93 | 2.34 | 90.1 | 35.8 |

The results of element analysis indicate that the elements of H and N are eliminated during the high temperature carbonization procedure. The ratios of C/H and C/N of NMCs increase with the rise of carbonization temperature, which clearly shows that the carbonization degree increases with the rise of carbonization temperature. Note that the N contents determined by element analysis are higher than those determined by XPS, which may be due to the different working mechanism between elemental analysis and XPS. In detail, element analysis gives a quantitative determination of element content in the whole body of materials or compounds, while XPS only gives an elemental composition of the surface (top 0–10 nm usually).

**Table S4** CO<sub>2</sub> sorption capacities of NMC-*x* at different temperatures and pressures

| Sample  | CO <sub>2</sub> sorption capacity (mmol g <sup>-1</sup> ) |          |             |
|---------|-----------------------------------------------------------|----------|-------------|
|         | 0 °C                                                      | 25 °C    | 25 °C       |
|         | P =1 bar                                                  | P =1 bar | P =0.15 bar |
| NMC-600 | 4.5                                                       | 3.9      | 1.67        |
| NMC-700 | 4.4                                                       | 3.6      | 1.4         |
| NMC-800 | 5.1                                                       | 4.0      | 1.6         |
| NMC-900 | 5.1                                                       | 3.9      | 1.4         |

**Table S5** CO<sub>2</sub> uptake values of various porous carbon materials at 25 °C

| Materials                         | Porosity                                              |                                                          | CO <sub>2</sub> uptake (mmol g <sup>-1</sup> ) |                                        | Reference         |
|-----------------------------------|-------------------------------------------------------|----------------------------------------------------------|------------------------------------------------|----------------------------------------|-------------------|
|                                   | S <sub>BET</sub><br>(m <sup>2</sup> g <sup>-1</sup> ) | V <sub>total</sub><br>(cm <sup>3</sup> g <sup>-1</sup> ) | 1 bar                                          | 0.15 bar                               |                   |
| <b>NMC-600</b>                    | <b>272</b>                                            | <b>0.15</b>                                              | <b>3.9</b>                                     | <b>1.67</b><br><b>(1.95, 0.20 bar)</b> | <b>This study</b> |
| <b>NMC-800</b>                    | <b>603</b>                                            | <b>0.31</b>                                              | <b>4.0</b>                                     | <b>1.6</b>                             | <b>This study</b> |
| activated carbon                  | 2829                                                  | 1.55                                                     | 2.92                                           | N.A.                                   | 7                 |
| HCM-DCH-1                         | 670                                                   | 0.46                                                     | 2.6                                            | ~1.0                                   | 8                 |
| PCN-71                            | 610                                                   | 0.31                                                     | 2.88                                           | ~1.0                                   | 9                 |
| CS-6                              | 530                                                   | 0.23                                                     | 3.8                                            | <1.5                                   | 10                |
| CS3-6A                            | 1184                                                  | 0.37<br>(<1.0 nm)                                        | 4.1                                            | <1.5                                   | 11                |
| N-doped ZTCs                      | 3360                                                  | 1.71                                                     | 4.38                                           | <1.0                                   | 12                |
| PAF-1/C-900                       | 1174                                                  | N.A.                                                     | 4.1                                            | ~1.3                                   | 13                |
| ACFK-3                            | 2180                                                  | 1.00                                                     | 5.7                                            | 1.6                                    | 14                |
| CS-8                              | 669                                                   | 0.29                                                     | 3.0                                            | 1.42                                   | 15                |
| KOH-activated OMC                 | 1820                                                  | 0.95                                                     | 3.4                                            | <1.0                                   | 16                |
| KOH-activated graphite nanofibers | 567                                                   | 0.71                                                     | 1.35                                           | <0.5                                   | 17                |
| CP-2-600                          | 1700                                                  | 0.88                                                     | 3.9                                            | ~1.0                                   | 18                |
| N-doped porous carbon monoliths   | 464                                                   | 0.23                                                     | 3.13                                           | N.A.                                   | 19                |
| NAC                               | 2546                                                  | 1.47                                                     | 3.75                                           | N.A.                                   | 7                 |
| porous carbon nitride spheres     | 550                                                   | 0.90                                                     | 2.90                                           | N.A.                                   | 20                |
| IBN9-NC1-A                        | 1181                                                  | 0.73                                                     | 4.50                                           | 1.75(0.2bar)                           | 21                |
| PC-1                              | 1600                                                  | 0.72                                                     | 3.5                                            | ~1.0                                   | 22                |
| MFB-600                           | 490                                                   | 0.91                                                     | 2.25                                           | N.A.                                   | 23                |
| AS-2-600                          | 1260                                                  | 0.62                                                     | 4.8                                            | ~1.2                                   | 24                |
| ZIF-81 ZIF-82 ZIF-95              |                                                       |                                                          | 2.2                                            |                                        | 25, 26            |
| CPF-6 (with 67% of N-donor sites) |                                                       |                                                          | 4.5 (0<br>°C)                                  |                                        | 27                |
| bio-MOF-11                        |                                                       |                                                          | 4.1                                            |                                        | 28                |
| SK-0.3-700                        | 1060                                                  | 0.52                                                     | 4.24                                           | 1.2                                    | 29                |
| SK-0.5-600                        | 710                                                   | 0.44                                                     | 3.60                                           | 1.3                                    | 29                |
| AC-750-0.5                        | 1060                                                  | 0.52                                                     | 4.30                                           | 1.38                                   | 30                |
| AC-700-1                          | 1685                                                  | 0.94                                                     | 4.10                                           | 0.93                                   | 30                |

N.A means not available.

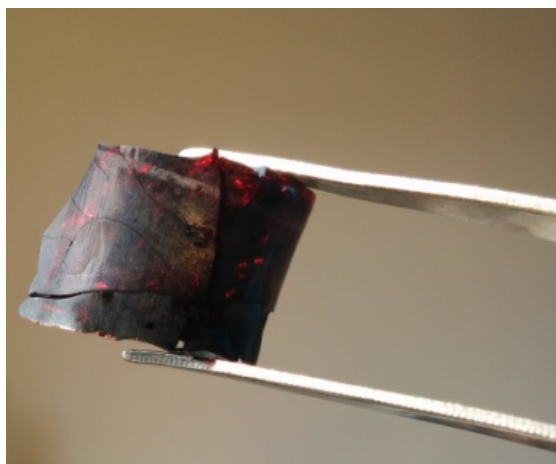

**Fig. S1** Digital camera image of xerogels

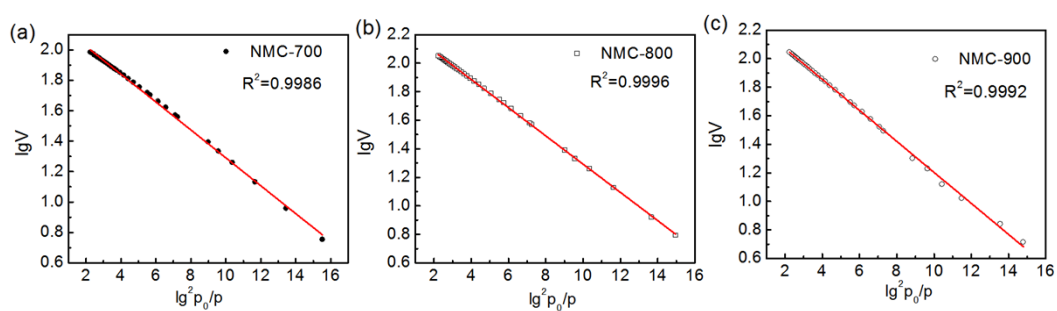

**Fig. S2** D-R plots for CO<sub>2</sub> sorption by (a) NMC-700, (b) NMC-800 and (c) NMC-900

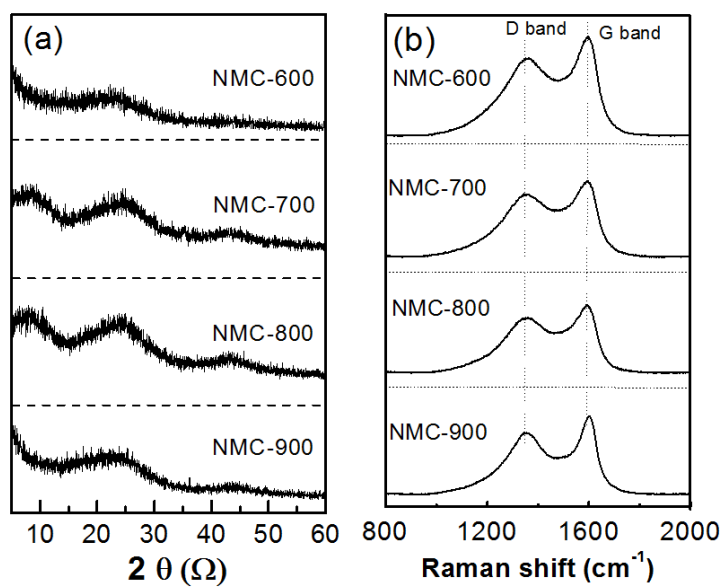

**Fig. S3** (a) Raman spectra and (b) XRD patterns of NMC-x

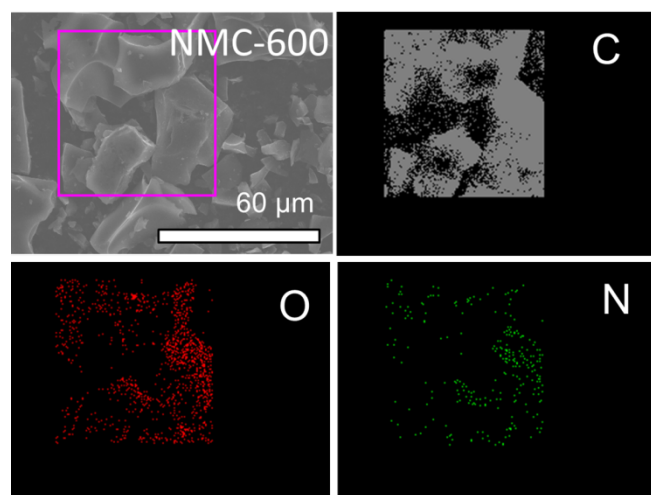

**Fig. S4** EDS mapping of NMC-600

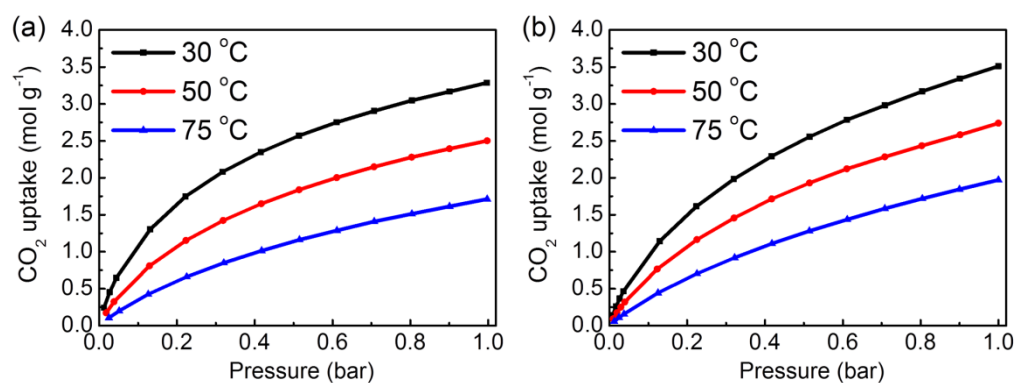

**Fig. S5** CO<sub>2</sub> sorption isotherms at elevated temperature (a) NMC-600, (b) NMC-800

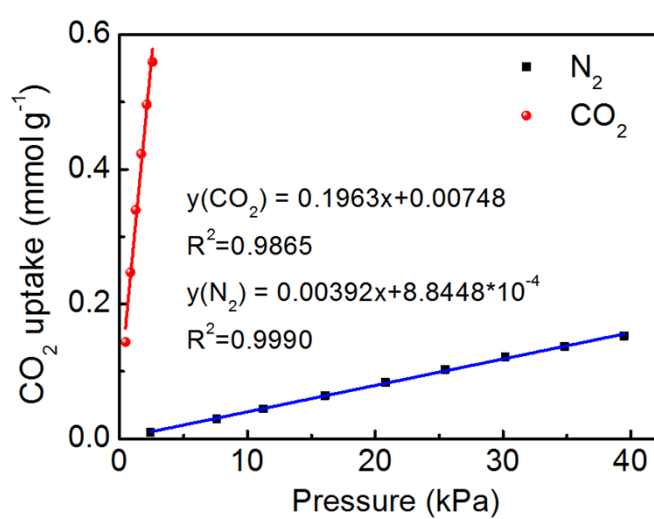

**Fig. S6** Initial slope calculation for CO<sub>2</sub> and N<sub>2</sub> isotherms collected at 25 °C

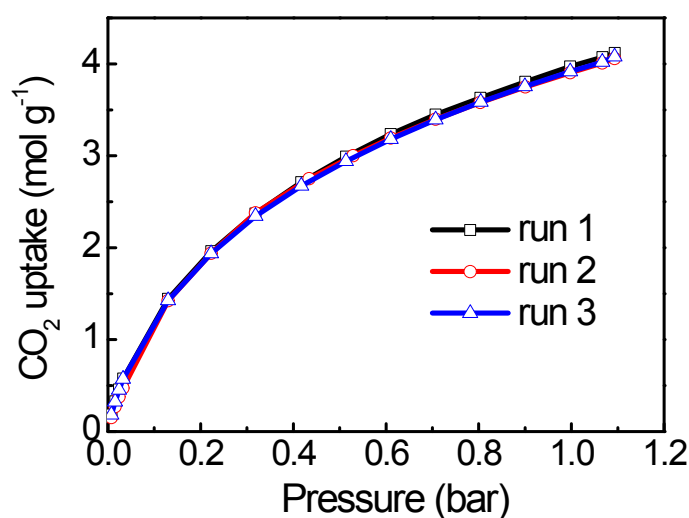

Fig. S7 Regeneration of NMC-800 for CO<sub>2</sub> uptake at 25 °C

#### References:

1. G. Y. Gor, M. Thommes, K. A. Cychosz and A. V. Neimark, *Carbon*, 2012, **50**, 1583-1590.
2. A. V. Neimark, Y. Lin, P. I. Ravikovitch and M. Thommes, *Carbon*, 2009, **47**, 1617-1628.
3. X. Wu, W. Xing, J. Florek, J. Zhou, G. Wang, S. Zhuo, Q. Xue, Z. Yan and F. Kleitz, *Journal of Materials Chemistry A*, 2014, **2**, 18998-19004.
4. M. Dubinin, *Carbon*, 1989, **27**, 457-467.
5. A. Wahby, J. M. Ramos-Fernandez, M. Martinez-Escandell, A. Sepulveda-Escribano, J. Silvestre-Albero and F. Rodriguez-Reinoso, *ChemSusChem*, 2010, **3**, 974-981.
6. F. Stoeckli and L. Ballerini, *Fuel*, 1991, **70**, 557-559.
7. Z. Zhang, M. Xu, H. Wang and Z. Li, *Chemical Engineering Journal*, 2010, **160**, 571-577.
8. G. P. Hao, W. C. Li, D. Qian, G. H. Wang, W. P. Zhang, T. Zhang, A. Q. Wang, F. Schuth, H. J. Bongard and A. H. Lu, *Journal of the American Chemical Society*, 2011, **133**, 11378-11388.
9. G.-P. Hao, Z.-Y. Jin, Q. Sun, X.-Q. Zhang, J.-T. Zhang and A.-H. Lu, *Energy & Environmental Science*, 2013, **6**, 3740-3747.
10. N. P. Wickramaratne and M. Jaroniec, *Journal of Materials Chemistry A*, 2013, **1**, 112-126.
11. N. P. Wickramaratne, J. Xu, M. Wang, L. Zhu, L. Dai and M. Jaroniec, *Chemistry of Materials*, 2014, **26**, 2820-2828.
12. Y. Xia, R. Mokaya, G. S. Walker and Y. Zhu, *Advanced Energy Materials*, 2011, **1**, 678-683.
13. Y. Zhang, B. Li, K. Williams, W. Y. Gao and S. Ma, *Chemical communications*, 2013, **49**, 10269-10271.
14. S. Y. Lee and S. J. Park, *Journal of colloid and interface science*, 2013, **389**, 230-235.
15. N. P. Wickramaratne and M. Jaroniec, *ACS applied materials & interfaces*, 2013, **5**, 1849-1855.
16. M. Sevilla and A. B. Fuertes, *Journal of Colloid Interface Science*, 2012, **366**, 147-154.
17. L. Y. Meng and S. J. Park, *Journal of Colloid Interface Science*, 2010, **352**, 498-503.
18. M. Sevilla, P. Valle-Vigón and A. B. Fuertes, *Advanced Functional Materials*, 2011, **21**, 2781-2787.

19. G. P. Hao, W. C. Li, D. Qian and A. H. Lu, *Advanced materials*, 2010, **22**, 853-857.
20. Q. Li, J. Yang, D. Feng, Z. Wu, Q. Wu, S. S. Park, C.-S. Ha and D. Zhao, *Nano Research*, 2010, **3**, 632-642.
21. Y. Zhao, L. Zhao, K. X. Yao, Y. Yang, Q. Zhang and Y. Han, *Journal of Materials Chemistry*, 2012, **22**, 19726-19731.
22. J. Wang, A. Heerwig, M. R. Lohe, M. Oschatz, L. Borchardt and S. Kaskel, *Journal of Materials Chemistry*, 2012, **22**, 13911-13913.
23. C. Pevida, T. C. Drage and C. E. Snape, *Carbon*, 2008, **46**, 1464-1474.
24. M. Sevilla and A. B. Fuertes, *Energy & Environmental Science*, 2011, **4**, 1765-1771.
25. R. Banerjee, H. Furukawa, D. Britt, C. Knobler, M. O'Keeffe and O. M. Yaghi, *Journal of the American Chemical Society*, 2009, **131**, 3875-3877.
26. B. Wang, A. P. Cote, H. Furukawa, M. O'Keeffe and O. M. Yaghi, *Nature*, 2008, **453**, 207-211.
27. Q. Lin, T. Wu, S. T. Zheng, X. Bu and P. Feng, *Journal of the American Chemical Society*, 2012, **134**, 784-787.
28. J. An, S. J. Geib and N. L. Rosi, *Journal of the American Chemical Society*, 2009, **132**, 38-39.
29. W. Xing, C. Liu, Z. Zhou, L. Zhang, J. Zhou, S. Zhuo, Z. Yan, H. Gao, G. Wang and S. Z. Qiao, *Energy & Environmental Science*, 2012, **5**, 7323-7327.
30. Z. Zhang, J. Zhou, W. Xing, Q. Xue, Z. Yan, S. Zhuo and S. Z. Qiao, *Physical Chemistry Chemical Physics*, 2013, **15**, 2523-2529.
